# Supplementary material
Source: publisher site journal article supplement (https://www.dovepress.com/article/231202)
Supplement: Supplementary file 1 [file get_supplementary_file.php]

Supplementary data

Table A: Independent and dependent variables applied in simple and multiple regression.

| Analysis applied                      | Independent variables                                                                                                                                                                                                                                                                                                                                                                                                                                                                                                                                                                                                                                                                                                                                         | Dependent variables                                                                                                                                                                                                                                                                                                         |
|---------------------------------------|---------------------------------------------------------------------------------------------------------------------------------------------------------------------------------------------------------------------------------------------------------------------------------------------------------------------------------------------------------------------------------------------------------------------------------------------------------------------------------------------------------------------------------------------------------------------------------------------------------------------------------------------------------------------------------------------------------------------------------------------------------------|-----------------------------------------------------------------------------------------------------------------------------------------------------------------------------------------------------------------------------------------------------------------------------------------------------------------------------|
| Simple and multiple linear regression | <p>Age: (i) effect of each year older, (ii) 18-29 years-old vs others, and <math>\geq 65</math> years-old vs others.</p> <p>Sex (effect of being male)</p> <p>Ethnicity: (i)European vs others, and (ii)Maori vs others</p> <p>Employment: (i)unemployed vs others, (ii)employed vs others, (iii) retired vs others</p> <p>Education (highest level): (i)university vs others, (ii)school vs others</p> <p>Number of medicines used: (i)total number used, (ii)using <math>\geq 5</math> medicines vs others, (iii)using <math>\geq 10</math> medicines vs others.</p> <p>Frequency of medicine used: (i)three times daily vs others, (ii)four times daily vs others</p> <p>Requires assistance with medicines use</p> <p>Pays for prescription medicines</p> | <p>LMQ-3 scores</p> <p>Domain scores</p> <ul style="list-style-type: none"> <li>• Relationship burden</li> <li>• Practicalities burden</li> <li>• Cost burden</li> <li>• Side effect burden</li> <li>• Lack of effect burden</li> <li>• Concern burden</li> <li>• Interference burden</li> <li>• Autonomy burden</li> </ul> |

Table B: Model for Table 4: Multiple linear regression - LMQ-3 score vs participants' sociodemographic and medicine-use characteristics

| Source   | SS                | df         | MS                |                 |               |  |
|----------|-------------------|------------|-------------------|-----------------|---------------|--|
| Model    | <b>25941.113</b>  | <b>5</b>   | <b>5188.22259</b> | Number of obs = | <b>472</b>    |  |
| Residual | <b>180889.326</b> | <b>466</b> | <b>388.174518</b> | F( 5, 466) =    | <b>13.37</b>  |  |
|          |                   |            |                   | Prob > F =      | <b>0.0000</b> |  |
|          |                   |            |                   | R-squared =     | <b>0.1254</b> |  |
|          |                   |            |                   | Adj R-squared = | <b>0.1160</b> |  |
| Total    | <b>206830.439</b> | <b>471</b> | <b>439.130443</b> | Root MSE =      | <b>19.702</b> |  |

  

| score   | Coef.            | Std. Err.       | t            | P> t         | [95% Conf. Interval] |                  |
|---------|------------------|-----------------|--------------|--------------|----------------------|------------------|
| young   | <b>10.72798</b>  | <b>3.125672</b> | <b>3.43</b>  | <b>0.001</b> | <b>4.585823</b>      | <b>16.87014</b>  |
| unemp   | <b>12.40465</b>  | <b>3.430624</b> | <b>3.62</b>  | <b>0.000</b> | <b>5.663236</b>      | <b>19.14605</b>  |
| uni     | <b>-5.659085</b> | <b>1.863426</b> | <b>-3.04</b> | <b>0.003</b> | <b>-9.320844</b>     | <b>-1.997327</b> |
| five    | <b>6.139668</b>  | <b>1.888714</b> | <b>3.25</b>  | <b>0.001</b> | <b>2.428216</b>      | <b>9.851119</b>  |
| mthreex | <b>7.392335</b>  | <b>2.172763</b> | <b>3.40</b>  | <b>0.001</b> | <b>3.122709</b>      | <b>11.66196</b>  |
| _cons   | <b>97.00557</b>  | <b>1.734712</b> | <b>55.92</b> | <b>0.000</b> | <b>93.59674</b>      | <b>100.4144</b>  |

  

| score   | Coef.            | Std. Err.       | t            | P> t         | Beta             |
|---------|------------------|-----------------|--------------|--------------|------------------|
| young   | <b>10.72798</b>  | <b>3.125672</b> | <b>3.43</b>  | <b>0.001</b> | <b>.1534557</b>  |
| unemp   | <b>12.40465</b>  | <b>3.430624</b> | <b>3.62</b>  | <b>0.000</b> | <b>.1572898</b>  |
| uni     | <b>-5.659085</b> | <b>1.863426</b> | <b>-3.04</b> | <b>0.003</b> | <b>-.1338419</b> |
| five    | <b>6.139668</b>  | <b>1.888714</b> | <b>3.25</b>  | <b>0.001</b> | <b>.145613</b>   |
| mthreex | <b>7.392335</b>  | <b>2.172763</b> | <b>3.40</b>  | <b>0.001</b> | <b>.1520398</b>  |
| _cons   | <b>97.00557</b>  | <b>1.734712</b> | <b>55.92</b> | <b>0.000</b> | <b>.</b>         |

KEY: Young=18-29 years-old; unemp=Unemployed; uni=University education; five=Uses  $\geq 5$  medicines; mthreex=Uses medicines  $\geq 3$ x daily

Table C: Model for Relationships burden in Table 5: Multiple linear regression - domain scores vs participants' sociodemographic and medicine-use characteristics

| Source   | SS                | df         | MS                |                               |  |  |
|----------|-------------------|------------|-------------------|-------------------------------|--|--|
| Model    | <b>53.9487638</b> | <b>1</b>   | <b>53.9487638</b> | Number of obs = <b>472</b>    |  |  |
| Residual | <b>5730.44954</b> | <b>470</b> | <b>12.1924458</b> | F( 1, 470) = <b>4.42</b>      |  |  |
| Total    | <b>5784.39831</b> | <b>471</b> | <b>12.2811004</b> | Prob > F = <b>0.0360</b>      |  |  |
|          |                   |            |                   | R-squared = <b>0.0093</b>     |  |  |
|          |                   |            |                   | Adj R-squared = <b>0.0072</b> |  |  |
|          |                   |            |                   | Root MSE = <b>3.4918</b>      |  |  |

  

| relb  | Coef.           | Std. Err.       | t            | P> t         | [95% Conf. Interval] |                 |
|-------|-----------------|-----------------|--------------|--------------|----------------------|-----------------|
| unemp | <b>1.2737</b>   | <b>.6055108</b> | <b>2.10</b>  | <b>0.036</b> | <b>.0838569</b>      | <b>2.463544</b> |
| _cons | <b>11.05963</b> | <b>.1672254</b> | <b>66.14</b> | <b>0.000</b> | <b>10.73103</b>      | <b>11.38823</b> |

  

| relb  | Coef.           | Std. Err.       | t            | P> t         | Beta            |
|-------|-----------------|-----------------|--------------|--------------|-----------------|
| unemp | <b>1.2737</b>   | <b>.6055108</b> | <b>2.10</b>  | <b>0.036</b> | <b>.0965743</b> |
| _cons | <b>11.05963</b> | <b>.1672254</b> | <b>66.14</b> | <b>0.000</b> | <b>.</b>        |

KEY: relb= Relationships burden (Relationships/communication with health professionals about medicines); unemp=Unemployed

Table D: Model for Practicalities burden in Table 5: Multiple linear regression - domain scores vs participants' sociodemographic and medicine-use characteristics

| Source   | SS                | df         | MS                | Number of obs = 472 |               |  |
|----------|-------------------|------------|-------------------|---------------------|---------------|--|
| Model    | <b>1349.14878</b> | <b>5</b>   | <b>269.829756</b> | F( 5, 466) =        | <b>15.98</b>  |  |
| Residual | <b>7866.60546</b> | <b>466</b> | <b>16.8811276</b> | Prob > F =          | <b>0.0000</b> |  |
| Total    | <b>9215.75424</b> | <b>471</b> | <b>19.5663572</b> | R-squared =         | <b>0.1464</b> |  |
|          |                   |            |                   | Adj R-squared =     | <b>0.1372</b> |  |
|          |                   |            |                   | Root MSE =          | <b>4.1087</b> |  |

  

| practb  | Coef.            | Std. Err.       | t            | P> t         | [95% Conf. Interval] |                 |
|---------|------------------|-----------------|--------------|--------------|----------------------|-----------------|
| young   | <b>3.038404</b>  | <b>.6400845</b> | <b>4.75</b>  | <b>0.000</b> | <b>1.780595</b>      | <b>4.296213</b> |
| euro    | <b>-1.400913</b> | <b>.6153221</b> | <b>-2.28</b> | <b>0.023</b> | <b>-2.610062</b>     | <b>-.191763</b> |
| unemp   | <b>1.785574</b>  | <b>.7404777</b> | <b>2.41</b>  | <b>0.016</b> | <b>.3304855</b>      | <b>3.240663</b> |
| mthreex | <b>2.103495</b>  | <b>.4460418</b> | <b>4.72</b>  | <b>0.000</b> | <b>1.226993</b>      | <b>2.979998</b> |
| helpy   | <b>2.232366</b>  | <b>.9155512</b> | <b>2.44</b>  | <b>0.015</b> | <b>.4332456</b>      | <b>4.031486</b> |
| _cons   | <b>15.36176</b>  | <b>.5960156</b> | <b>25.77</b> | <b>0.000</b> | <b>14.19055</b>      | <b>16.53297</b> |

  

| practb  | Coef.            | Std. Err.       | t            | P> t         | Beta             |
|---------|------------------|-----------------|--------------|--------------|------------------|
| young   | <b>3.038404</b>  | <b>.6400845</b> | <b>4.75</b>  | <b>0.000</b> | <b>.2058982</b>  |
| euro    | <b>-1.400913</b> | <b>.6153221</b> | <b>-2.28</b> | <b>0.023</b> | <b>-.0975699</b> |
| unemp   | <b>1.785574</b>  | <b>.7404777</b> | <b>2.41</b>  | <b>0.016</b> | <b>.1072596</b>  |
| mthreex | <b>2.103495</b>  | <b>.4460418</b> | <b>4.72</b>  | <b>0.000</b> | <b>.2049553</b>  |
| helpy   | <b>2.232366</b>  | <b>.9155512</b> | <b>2.44</b>  | <b>0.015</b> | <b>.1087717</b>  |
| _cons   | <b>15.36176</b>  | <b>.5960156</b> | <b>25.77</b> | <b>0.000</b> | <b>.</b>         |

KEY: practb= Practicalities burden; young=18-29 years-old; euro=European; unemp=Unemployed; mthreex=Uses medicines  $\geq 3x$  daily; helpy=Requires assistance with medicine use

Table E: Model for Cost-related burden in Table 5: Multiple linear regression - domain scores vs participants' sociodemographic and medicine-use characteristics

| Source   | SS                | df         | MS                | Number of obs = 472 |               |  |
|----------|-------------------|------------|-------------------|---------------------|---------------|--|
| Model    | <b>839.66146</b>  | <b>7</b>   | <b>119.951637</b> | F( 7, 464) =        | <b>16.20</b>  |  |
| Residual | <b>3436.43812</b> | <b>464</b> | <b>7.40611663</b> | Prob > F =          | <b>0.0000</b> |  |
| Total    | <b>4276.09958</b> | <b>471</b> | <b>9.07876768</b> | R-squared =         | <b>0.1964</b> |  |
|          |                   |            |                   | Adj R-squared =     | <b>0.1842</b> |  |
|          |                   |            |                   | Root MSE =          | <b>2.7214</b> |  |

  

| costb   | Coef.            | Std. Err.       | t            | P> t         | [95% Conf. Interval] |                 |
|---------|------------------|-----------------|--------------|--------------|----------------------|-----------------|
| young   | <b>1.959442</b>  | <b>.4328594</b> | <b>4.53</b>  | <b>0.000</b> | <b>1.108834</b>      | <b>2.81005</b>  |
| unemp   | <b>1.363539</b>  | <b>.4918066</b> | <b>2.77</b>  | <b>0.006</b> | <b>.3970945</b>      | <b>2.329983</b> |
| uni     | <b>-1.148214</b> | <b>.257638</b>  | <b>-4.46</b> | <b>0.000</b> | <b>-1.654496</b>     | <b>-.641932</b> |
| five    | <b>.9965071</b>  | <b>.2617658</b> | <b>3.81</b>  | <b>0.000</b> | <b>.4821138</b>      | <b>1.5109</b>   |
| mthreex | <b>1.106603</b>  | <b>.3004244</b> | <b>3.68</b>  | <b>0.000</b> | <b>.5162419</b>      | <b>1.696964</b> |
| helpy   | <b>1.295647</b>  | <b>.6091788</b> | <b>2.13</b>  | <b>0.034</b> | <b>.0985564</b>      | <b>2.492738</b> |
| pay     | <b>1.53537</b>   | <b>.4384991</b> | <b>3.50</b>  | <b>0.001</b> | <b>.6736799</b>      | <b>2.39706</b>  |
| _cons   | <b>4.828366</b>  | <b>.4705065</b> | <b>10.26</b> | <b>0.000</b> | <b>3.903779</b>      | <b>5.752954</b> |

  

| costb   | Coef.            | Std. Err.       | t            | P> t         | Beta             |
|---------|------------------|-----------------|--------------|--------------|------------------|
| young   | <b>1.959442</b>  | <b>.4328594</b> | <b>4.53</b>  | <b>0.000</b> | <b>.194931</b>   |
| unemp   | <b>1.363539</b>  | <b>.4918066</b> | <b>2.77</b>  | <b>0.006</b> | <b>.120245</b>   |
| uni     | <b>-1.148214</b> | <b>.257638</b>  | <b>-4.46</b> | <b>0.000</b> | <b>-.1888652</b> |
| five    | <b>.9965071</b>  | <b>.2617658</b> | <b>3.81</b>  | <b>0.000</b> | <b>.1643687</b>  |
| mthreex | <b>1.106603</b>  | <b>.3004244</b> | <b>3.68</b>  | <b>0.000</b> | <b>.1582891</b>  |
| helpy   | <b>1.295647</b>  | <b>.6091788</b> | <b>2.13</b>  | <b>0.034</b> | <b>.0926785</b>  |
| pay     | <b>1.53537</b>   | <b>.4384991</b> | <b>3.50</b>  | <b>0.001</b> | <b>.1467848</b>  |
| _cons   | <b>4.828366</b>  | <b>.4705065</b> | <b>10.26</b> | <b>0.000</b> | <b>.</b>         |

KEY: costb=Cost-related burden; young=18-29 years-old; unemp=Unemployed; uni=University educated; five=Uses ≥5 medicines; mthreex=Uses medicines ≥3x daily; helpy=Requires assistance with medicine use; pay=Pays for prescription medicines

Table F part 1: Model for Side effect burden in Table 5: Multiple linear regression - domain scores vs participants' sociodemographic and medicine-use characteristics

| Source   | SS                | df         | MS                |                 |               |  |
|----------|-------------------|------------|-------------------|-----------------|---------------|--|
| Model    | <b>616.93739</b>  | <b>3</b>   | <b>205.645797</b> | Number of obs = | <b>472</b>    |  |
| Residual | <b>6851.28083</b> | <b>468</b> | <b>14.639489</b>  | F( 3, 468) =    | <b>14.05</b>  |  |
| Total    | <b>7468.21822</b> | <b>471</b> | <b>15.8560896</b> | Prob > F =      | <b>0.0000</b> |  |
|          |                   |            |                   | R-squared =     | <b>0.0826</b> |  |
|          |                   |            |                   | Adj R-squared = | <b>0.0767</b> |  |
|          |                   |            |                   | Root MSE =      | <b>3.8262</b> |  |

  

| sideb   | Coef.           | Std. Err.       | t            | P> t         | [95% Conf. Interval] |                 |
|---------|-----------------|-----------------|--------------|--------------|----------------------|-----------------|
| unemp   | <b>2.133193</b> | <b>.6646793</b> | <b>3.21</b>  | <b>0.001</b> | <b>.827068</b>       | <b>3.439319</b> |
| five    | <b>1.347118</b> | <b>.3593723</b> | <b>3.75</b>  | <b>0.000</b> | <b>.640935</b>       | <b>2.053301</b> |
| mthreex | <b>1.413719</b> | <b>.4151129</b> | <b>3.41</b>  | <b>0.001</b> | <b>.5980029</b>      | <b>2.229435</b> |
| _cons   | <b>9.174946</b> | <b>.2782985</b> | <b>32.97</b> | <b>0.000</b> | <b>8.628077</b>      | <b>9.721815</b> |

  

| sideb   | Coef.           | Std. Err.       | t            | P> t         | Beta            |
|---------|-----------------|-----------------|--------------|--------------|-----------------|
| unemp   | <b>2.133193</b> | <b>.6646793</b> | <b>3.21</b>  | <b>0.001</b> | <b>.142346</b>  |
| five    | <b>1.347118</b> | <b>.3593723</b> | <b>3.75</b>  | <b>0.000</b> | <b>.1681357</b> |
| mthreex | <b>1.413719</b> | <b>.4151129</b> | <b>3.41</b>  | <b>0.001</b> | <b>.1530162</b> |
| _cons   | <b>9.174946</b> | <b>.2782985</b> | <b>32.97</b> | <b>0.000</b> | <b>.</b>        |

KEY: sideb=Side Effect burden; unemp=Unemployed; five=Uses ≥5 medicines; mthreex=Uses medicines ≥3x daily

Table F part 2: Model for Lack of effectiveness burden in Table 5: Multiple linear regression - domain scores vs participants' sociodemographic and medicine-use characteristics

| Source   | SS                | df         | MS                |                 |               |  |
|----------|-------------------|------------|-------------------|-----------------|---------------|--|
| Model    | <b>56.3905857</b> | <b>1</b>   | <b>56.3905857</b> | Number of obs = | <b>472</b>    |  |
| Residual | <b>7058.69416</b> | <b>470</b> | <b>15.0184982</b> | F( 1, 470) =    | <b>3.75</b>   |  |
| Total    | <b>7115.08475</b> | <b>471</b> | <b>15.106337</b>  | Prob > F =      | <b>0.0533</b> |  |
|          |                   |            |                   | R-squared =     | <b>0.0079</b> |  |
|          |                   |            |                   | Adj R-squared = | <b>0.0058</b> |  |
|          |                   |            |                   | Root MSE =      | <b>3.8754</b> |  |

  

| effectb | Coef.            | Std. Err.       | t            | P> t         | [95% Conf. Interval] |                 |
|---------|------------------|-----------------|--------------|--------------|----------------------|-----------------|
| uni     | <b>-.6981523</b> | <b>.3602965</b> | <b>-1.94</b> | <b>0.053</b> | <b>-1.406144</b>     | <b>.0098392</b> |
| _cons   | <b>13.57993</b>  | <b>.2362855</b> | <b>57.47</b> | <b>0.000</b> | <b>13.11562</b>      | <b>14.04423</b> |

  

| effectb | Coef.            | Std. Err.       | t            | P> t         | Beta             |
|---------|------------------|-----------------|--------------|--------------|------------------|
| uni     | <b>-.6981523</b> | <b>.3602965</b> | <b>-1.94</b> | <b>0.053</b> | <b>-.0890253</b> |
| _cons   | <b>13.57993</b>  | <b>.2362855</b> | <b>57.47</b> | <b>0.000</b> | <b>.</b>         |

Key effectb=Lack of effectiveness burden; uni=University educated

Table F part 3: Model for Concerns burden in Table 5: Multiple linear regression - domain scores vs participants' sociodemographic and medicine-use characteristics

| Source   | SS                | df         | MS                | Number of obs = 472 |               |  |
|----------|-------------------|------------|-------------------|---------------------|---------------|--|
| Model    | <b>1016.68826</b> | <b>5</b>   | <b>203.337651</b> | F( 5, 466) =        | <b>8.27</b>   |  |
| Residual | <b>11460.2927</b> | <b>466</b> | <b>24.5929027</b> | Prob > F =          | <b>0.0000</b> |  |
| Total    | <b>12476.9809</b> | <b>471</b> | <b>26.4904054</b> | R-squared =         | <b>0.0815</b> |  |
|          |                   |            |                   | Adj R-squared =     | <b>0.0716</b> |  |
|          |                   |            |                   | Root MSE =          | <b>4.9591</b> |  |

  

| attb  | Coef.            | Std. Err.       | t            | P> t         | [95% Conf. Interval] |                  |
|-------|------------------|-----------------|--------------|--------------|----------------------|------------------|
| young | <b>2.608786</b>  | <b>.7745365</b> | <b>3.37</b>  | <b>0.001</b> | <b>1.08677</b>       | <b>4.130803</b>  |
| euro  | <b>-1.954674</b> | <b>.7426452</b> | <b>-2.63</b> | <b>0.009</b> | <b>-3.414022</b>     | <b>-.4953259</b> |
| unemp | <b>2.072179</b>  | <b>.8622419</b> | <b>2.40</b>  | <b>0.017</b> | <b>.3778154</b>      | <b>3.766543</b>  |
| uni   | <b>-1.285021</b> | <b>.4695078</b> | <b>-2.74</b> | <b>0.006</b> | <b>-2.207635</b>     | <b>-.3624059</b> |
| five  | <b>1.565304</b>  | <b>.4672104</b> | <b>3.35</b>  | <b>0.001</b> | <b>.6472037</b>      | <b>2.483404</b>  |
| _cons | <b>21.25059</b>  | <b>.7985218</b> | <b>26.61</b> | <b>0.000</b> | <b>19.68144</b>      | <b>22.81974</b>  |

  

| attb  | Coef.            | Std. Err.       | t            | P> t         | Beta             |
|-------|------------------|-----------------|--------------|--------------|------------------|
| young | <b>2.608786</b>  | <b>.7745365</b> | <b>3.37</b>  | <b>0.001</b> | <b>.1519344</b>  |
| euro  | <b>-1.954674</b> | <b>.7426452</b> | <b>-2.63</b> | <b>0.009</b> | <b>-.1170011</b> |
| unemp | <b>2.072179</b>  | <b>.8622419</b> | <b>2.40</b>  | <b>0.017</b> | <b>.1069784</b>  |
| uni   | <b>-1.285021</b> | <b>.4695078</b> | <b>-2.74</b> | <b>0.006</b> | <b>-.1237395</b> |
| five  | <b>1.565304</b>  | <b>.4672104</b> | <b>3.35</b>  | <b>0.001</b> | <b>.1511494</b>  |
| _cons | <b>21.25059</b>  | <b>.7985218</b> | <b>26.61</b> | <b>0.000</b> | <b>.</b>         |

KEY: attb=Concerns burden (Attitudes and concerns about medicines); young=18-29 years-old; euro=European; unemp=Unemployed; uni=University educated; five=Uses ≥5 medicines



Table G: Model for Interference burden in Table 5: Multiple linear regression - domain scores vs participants' sociodemographic and medicine-use characteristics

| Source   | SS         | df  | MS         | Number of obs = 472 |        |  |
|----------|------------|-----|------------|---------------------|--------|--|
| Model    | 2459.57456 | 6   | 409.929093 | F( 6, 465) =        | 21.43  |  |
| Residual | 8893.11824 | 465 | 19.1249855 | Prob > F =          | 0.0000 |  |
| Total    | 11352.6928 | 471 | 24.1033817 | R-squared =         | 0.2167 |  |
|          |            |     |            | Adj R-squared =     | 0.2065 |  |
|          |            |     |            | Root MSE =          | 4.3732 |  |

  

| dayb    | Coef.     | Std. Err. | t     | P> t  | [95% Conf. Interval] |           |
|---------|-----------|-----------|-------|-------|----------------------|-----------|
| young   | 3.794837  | .6976384  | 5.44  | 0.000 | 2.423923             | 5.165751  |
| sex     | 1.415542  | .4244906  | 3.33  | 0.001 | .5813851             | 2.2497    |
| unemp   | 2.62062   | .7625354  | 3.44  | 0.001 | 1.122178             | 4.119062  |
| uni     | -1.366038 | .4136225  | -3.30 | 0.001 | -2.178839            | -.5532374 |
| five    | 1.836273  | .4209787  | 4.36  | 0.000 | 1.009017             | 2.66353   |
| mthreex | 2.839523  | .4856145  | 5.85  | 0.000 | 1.885253             | 3.793794  |
| _cons   | 11.6841   | .4337326  | 26.94 | 0.000 | 10.83178             | 12.53642  |

  

| dayb    | Coef.     | Std. Err. | t     | P> t  | Beta      |
|---------|-----------|-----------|-------|-------|-----------|
| young   | 3.794837  | .6976384  | 5.44  | 0.000 | .2316947  |
| sex     | 1.415542  | .4244906  | 3.33  | 0.001 | .1397334  |
| unemp   | 2.62062   | .7625354  | 3.44  | 0.001 | .1418333  |
| uni     | -1.366038 | .4136225  | -3.30 | 0.001 | -.1379007 |
| five    | 1.836273  | .4209787  | 4.36  | 0.000 | .1858876  |
| mthreex | 2.839523  | .4856145  | 5.85  | 0.000 | .2492752  |
| _cons   | 11.6841   | .4337326  | 26.94 | 0.000 | .         |

KEY: dayb=Interference burden (Impact and interference on day-to-day life); young=18-29 years-old; sex=male; unemp=Unemployed; uni=University educated; five=Uses ≥5 medicines; mthreex=Uses medicines ≥3x daily

Table H: Model for Autonomy burden in Table 5: Multiple linear regression - domain scores vs participants' sociodemographic and medicine-use characteristics

| Source   | SS                | df         | MS                |                               |  |  |
|----------|-------------------|------------|-------------------|-------------------------------|--|--|
| Model    | <b>323.495562</b> | <b>2</b>   | <b>161.747781</b> | Number of obs = <b>472</b>    |  |  |
| Residual | <b>3172.95995</b> | <b>469</b> | <b>6.76537302</b> | F( 2, 469) = <b>23.91</b>     |  |  |
| Total    | <b>3496.45551</b> | <b>471</b> | <b>7.42347242</b> | Prob > F = <b>0.0000</b>      |  |  |
|          |                   |            |                   | R-squared = <b>0.0925</b>     |  |  |
|          |                   |            |                   | Adj R-squared = <b>0.0887</b> |  |  |
|          |                   |            |                   | Root MSE = <b>2.601</b>       |  |  |

  

| autonb  | Coef.            | Std. Err.       | t            | P> t         | [95% Conf. Interval] |                  |
|---------|------------------|-----------------|--------------|--------------|----------------------|------------------|
| ret     | <b>1.293255</b>  | <b>.2399</b>    | <b>5.39</b>  | <b>0.000</b> | <b>.8218429</b>      | <b>1.764667</b>  |
| mthreex | <b>-1.115342</b> | <b>.2785646</b> | <b>-4.00</b> | <b>0.000</b> | <b>-1.662731</b>     | <b>-.5679527</b> |
| _cons   | <b>10.33124</b>  | <b>.1840678</b> | <b>56.13</b> | <b>0.000</b> | <b>9.969539</b>      | <b>10.69294</b>  |

  

| autonb  | Coef.            | Std. Err.       | t            | P> t         | Beta             |
|---------|------------------|-----------------|--------------|--------------|------------------|
| ret     | <b>1.293255</b>  | <b>.2399</b>    | <b>5.39</b>  | <b>0.000</b> | <b>.2375465</b>  |
| mthreex | <b>-1.115342</b> | <b>.2785646</b> | <b>-4.00</b> | <b>0.000</b> | <b>-.1764318</b> |
| _cons   | <b>10.33124</b>  | <b>.1840678</b> | <b>56.13</b> | <b>0.000</b> | <b>.</b>         |

KEY: dayb=Autonomy burden (Control and Autonomy to vary routine); ret=retired; mthreex=Uses medicines ≥3x daily
